# Supplementary material
Source: PubMed Central journal article supplement (PMC3366847)

### Supplementary Figure Title and Legend

**Supplemental Figure 1. The effects of K<sup>+</sup>, Na<sup>+</sup>, Cl<sup>-</sup>, and glutamate ions on the site-selective editing activity of ADAR2s.** Site-selective editing of adenosine 139 in sqKv1.1 mRNAs by recombinant sqADAR2a (■) and sqADAR2b (○) was estimated in buffers containing K-Glutamate (i), Na-Glutamate (ii) or KCl (iii) as the major ions. Editing percentages were quantified over a wide range of salt concentrations (10-400 mM). Each assay contained 1 nM of ADAR2 and 0.5 pM of dsRNA. Error bars=SD and n=3.

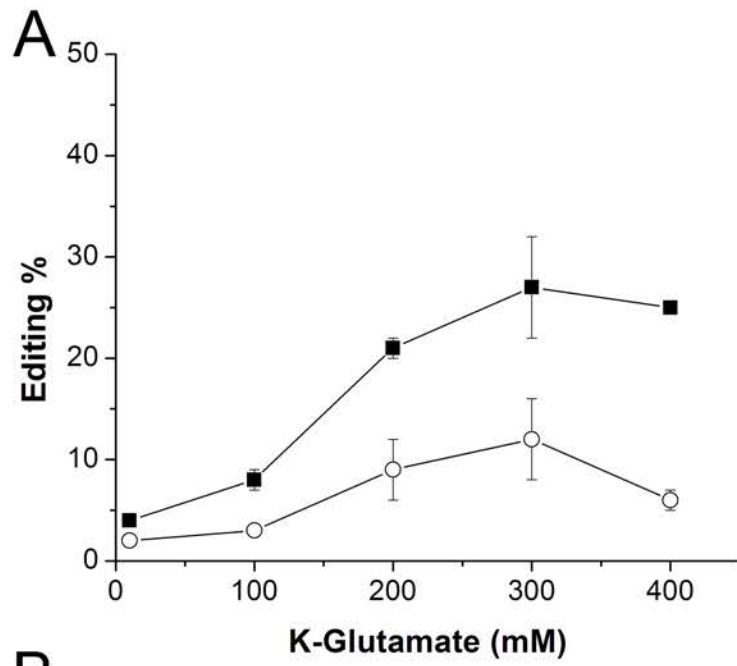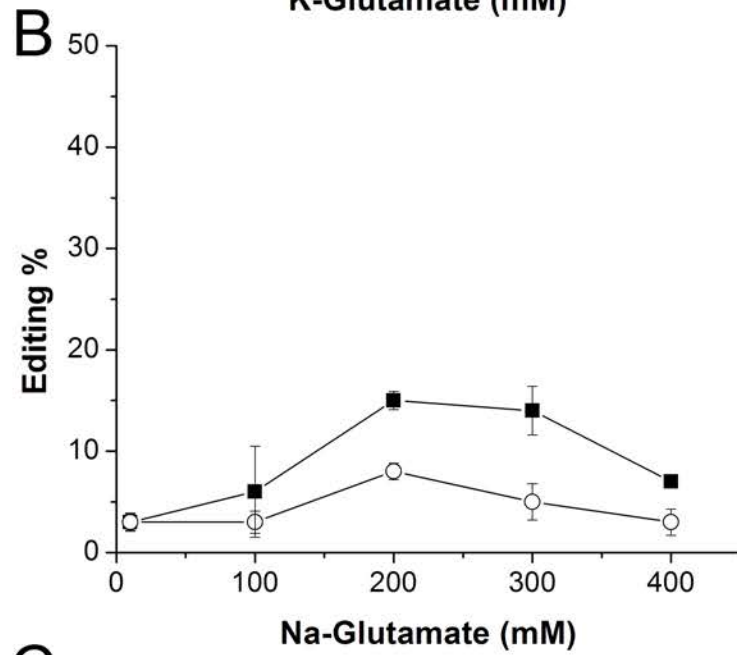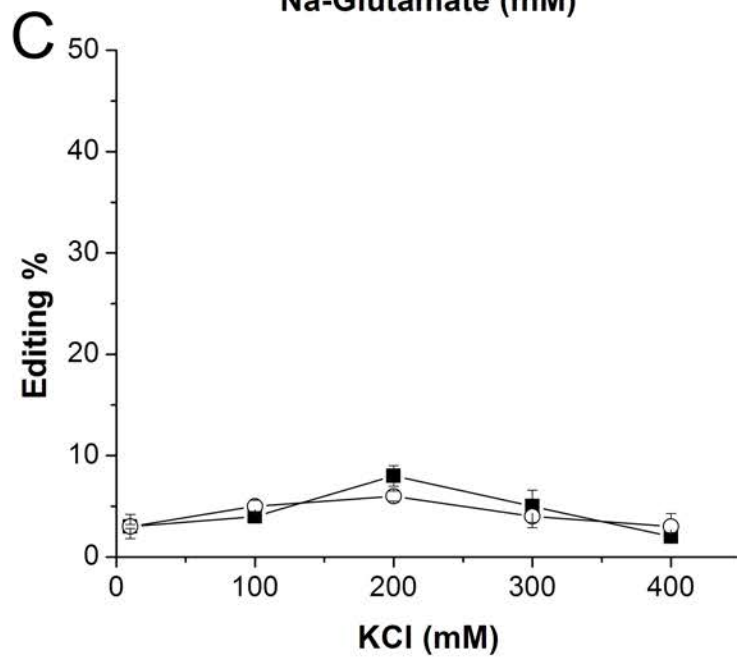

Supplement: supp_M112.366005_jbc.M112.366005-1.pdf [file supp_M112.366005_jbc.M112.366005-1.pdf]
